# Supplementary material
Source: Research Square preprint supplement (doi:10.21203/rs.3.rs-9657794/v1)
Supplement: Supplementary file 2 [file 65015e2e1453f138902733bb.docx]

##
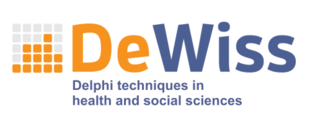

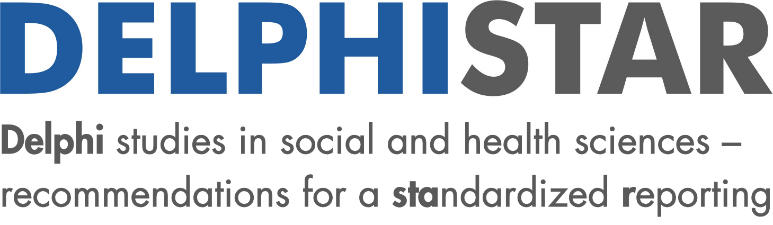

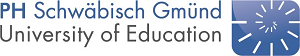


**Delphi studies in social and health sciences – recommendations for an interdisciplinary standardized reporting (DELPHISTAR).**

From: Niederberger, M., Schifano, J., Deckert, S., Hirt, J., Homberg, A., Köberich, S., Kuhn, R., Rommel, A., Sonnberger, M. & the DEWISS network (2024). Delphi studies in social and health sciences—Recommendations for an interdisciplinary standardized reporting (DELPHISTAR). Results of a Delphi study. *PLoS ONE 19(8):* e0304651. <https://doi.org/10.1371/journal.pone.0304651>

More information under OSF (<https://osf.io/gc4jk>) and DEWISS (<https://delphi.ph-gmuend.de/>)

**What is the aim of DELPHISTAR?**

- Improve, harmonize, and make the reporting in publications on Delphi studies comparable
- Facilitate the evaluation of Delphi studies including during peer review processes
- Reduce, and ideally prevent, inconsistencies and unclear descriptions in publications on Delphi studies
- Raise awareness of the diversity among the Delphi variants and of their specific potentials and challenges

**DELPHISTAR is a Delphi reporting guideline that is:**

- valid for all Delphi variants (e.g., classic Delphi, real-time Delphi, group Delphi, policy Delphi, argumentative Delphi, café Delphi)
- applicable to different purposes (e.g., Delphi studies to establish consensus, to gather expert judgments or to forecast)
- given equal consideration in the health and social sciences

**This reporting guideline is meant for studies using Delphi techniques in the health and social sciences.** These also include all Delphi variants and modifications that meet the following criteria:

1. Survey of several people (=experts) with specialized knowledge (e.g., operational knowledge, experiential knowledge, functional knowledge, contextual knowledge)
2. Structured communication process
3. Carrying out at least two survey rounds or the option to respond at least two times
4. Feedback: the (interim) results are presented to the experts starting from the second round
5. Basis is a quantitative questionnaire with the possibility to contribute or supplement arguments for the respective position
6. Quantitative and qualitative answer are systematically analyzed (quantitative: e.g., descriptive statistics, qualitative: e.g., thematic analysis)

This reporting guideline is available in English and German at <https://delphi.ph-gmuend.de/activities/delphistar> (last update October 2024).

**Contact**

Prof. Dr. Marlen Niederberger

E-mail: marlen.niederberger@ph-gmuend.de

Department of Research Methods in Health Promotion and Prevention

Institute for Health Sciences, University of Education Schwäbisch Gmünd,

Oberbettringer Straße 200, 73525 Schwäbisch Gmünd, Germany

| **Topic** | **Section** | **Item** | **Checklist Item** | **Location where item is reported** | **Exemplary wording** |
| --- | --- | --- | --- | --- | --- |
| **I**  **Title and Abstract** |  | 1 | Identification as a Delphi study in the title | Title. Page 1. | What is a public health intervention? Results of a Delphi study. |
|  | 2 | Identification as a Delphi study in the abstract | Abstract, introduction. Page 2. | A Delphi study was selected to answer the research question. |
|  | 3 | Structured abstract | Abstract. Page 2. | e.g., background, method, results and discussion |
| **II**  **Context** | **Formal** | 4 | Information about the sources of funding | Financial Support Statement. Page 14. | The Delphi study was funded by [SOURCE]. |
| 5 | Information about the team of authors and/or researchers (e.g., discipline, institution) | Title page. Page 1. | The Delphi study was conducted by an interdisciplinary team with representatives from medicine, public health, and health promotion. |
| 6 | Information about method consulting | Method – Study design, setting and ethics. Page 4. | The study group was advised by experts from [INSTITUTION] regarding statistics.  Or:  No consulting in regard to method took place. |
| 7 | Information about the project background | Introduction. Page 3. | The Delphi study was part of a mixed-methods study on [AIM]. |
| 8 | Information about the study protocol | Method – Study design, setting and ethics. Page 4. | The study protocol is available at [LINK]. |
|  | **Content** | 9 | Justification of the chosen method (Delphi) to answer the research question | Method – Study design, setting and ethics. Page 4. | The Delphi method is suitable for answering the research question because it systematically gathers the judgments of different expert groups and can identity agreement and disagreement. |
| 10 | Aim of the Delphi study (e.g., consensus, forecasting) | Introduction. Page 3. | The aim of the Delphi study is to find consensus on criteria to define a public health intervention. |
| **III**  **Method** | **Body & Integration of knowledge** | 11 | Identification and elucidation of relevant expertise, spheres of experience, and perspectives (e.g., theory, practice, affected groups, disciplines) | Method – Delphi panel. Page 4-5. | The experts represent the sciences and clinical practice because [REASON]. |
| 12 | Handling of knowledge, expertise and perspectives which are missing or have been deliberately not integrated | Method – Delphi panel. Page 4 –5 | If it is not possible to recruit experts specialized in [AREA], this will be openly communicated to the other experts during the Delphi study. |
| 13 | Basic definition of expert1 | Method – Delphi panel. Page 5. | A person who has been active in the area for at least [NUMBER] years is considered to be an expert. |
| **Delphi variant and modifications** | 14 | Identification of the type of Delphi variant and potential modifications (e.g., classic Delphi, real-time Delphi, group Delphi) | Method – Delphi Process. Page 5. | A classic Delphi study was used [LITERATURE REFERENCE]. |
| 15 | Justification of the Delphi variant and modifications, including during the Delphi study, if applicable | Method – Delphi Process. Page 5-6. | If the willingness to participate clearly decreases between the first and second round, a third round will not be held. |
| **Sample of experts** | 16 | Selection criteria for the experts (per round, per expert group if applicable) | Method – Delphi panel. Page 4-5. | All of the experts who met the definition were invited to the first round.  All of the experts who completed the previous round were invited to participate in the subsequent round. |
| 17 | Identification of the experts | Method – Delphi panel. Page 5. | The experts were identified based on publications in [DATABASE]. |
| 18 | Information about recruiting and any subsequent recruiting of experts | Method – Delphi panel. Page 5. | The experts were informed about the Delphi study and invited to participate. |
| **Survey** | 19 | Elucidation of the content development for the questionnaire2 | Method – Development of preliminary items. Page 4. | The questionnaire was developed based on the results of systematic reviews [LITERATURE REFERENCE]. |
| 20 | Description of the questionnaire (content and structure) | Method – Development of preliminary items. Page 4. | The questionnaire was divided into three segments on [TOPICS]. The statements made in the questionnaire were evaluated using standardized items, with the option to comment in free-text boxes. |
| **Delphi rounds** | 21 | Number of Delphi rounds | Method – Delphi Process. Page 5. | Three Delphi rounds were held. |
| 22 | Information about the aims of the individual Delphi rounds | Method – Delphi Process. Page 5-6. | The first Delphi round focused on exploring relevant aspects. These aspects were then presented to the experts in the second Delphi round for standardized evaluation. |
| 23 | Disclosure and justification of the criterion for discontinuation | Method – Delphi Process. Page 5-6. | The number of rounds was defined in advance to be a maximum of three rounds. |
| **Feedback** | 24 | Information about what data was reported back per round | Method – Delphi Process. Page 6. | In terms of feedback, we shared the statistical results plus the summary of the open responses. |
| 25 | Information on how the results of the previous Delphi round were fed back to the experts surveyed (e.g., via frequencies, mean values, measures of dispersion, listing of comments) | Method – Delphi Process. Page 6. | Mean values, standard deviations and percentage frequency distributions were reported. |
| 26 | Information on whether feedback was differentiated by specific groups (e.g., by field of expertise, institutional affiliation) | Method – Delphi Process. Page 6. | The feedback was aggregated across all expert groups. |
| 27 | Information about how dissent and unclear results were handled | Method – Delphi Process. Page 6. | The results showing dissent were presented again for evaluation in the next Delphi round. |
| **Data analysis** | 28 | Disclosure of the quantitative and qualitative analytical strategy | Method – Delphi Process. Page 5-6. | The quantitative items were descriptively analyzed. The open-ended items were analyzed using thematic analysis [LITERATURE REFERENCE]. |
| 29 | Definition and measurement of consensus | Method – Delphi Process. Page 6. | Consensus was defined as percentage agreement, meaning that agreement was assumed if at least 80% of the respondents agreed on an item. |
| 30 | Information on group-specific analysis or weighting of experts (e.g., theory vs. practice, discipline-specific analysis) | Method – Delphi Process. Page 6. | In the analysis, the mean values for percent agreement are weighted for each expert group in terms of the number of group members. |
| **IV**  **Results** | **Delphi process** | 31 | Illustration of the Delphi study (e.g., in a flow chart) | Figure 1 | A summary of the Delphi study is illustrated in a flow chart (Figure 1). |
| 32 | Information about special aspects during the Delphi study (e.g., deviations from the intended approach with justification) | Results – Delphi Process – Page 7. | During the Delphi study the political discussion mentioned climate change and the effects on health. It is possible that this influenced the experts' responses. |
| 33 | Number of experts per round (both invited and participating) | Results – Delphi Process – Page 8 and Table 1. | The number of experts participating in the first Delphi round was [NUMBER], and the number of experts in the second round was [NUMBER]. This corresponds to a response rate of [NUMBER]% in the first round and [NUMBER]% in the second round. |
| **Results** | 34 | Presentation of the results for each Delphi round and the final results | Results – Statements. Page 7-8 and Appendix – Results per round. | In the first Delphi round [NUMBER]% of the experts agreed, in the second [NUMBER]%, and in the third [NUMBER]%. |
| **V Discussion** | **Quality of findings** | 35 | Highlighting the findings from the Delphi study | Discussion- Page 8. | The central findings can be summarized as follows: [STATE FINDINGS]. |
| 36 | Validity of the results (e.g., transferability of the findings) | Discussion- Page 8-9 | The results are not transferable to other countries due to different legal regulations. |
| 37 | Reliability of the results (e.g., split half, inter-rater reliability) | Discussion- Page 9. | The responses in the free-text comments were analyzed by two independent reviewers [SPECIFY]. |
| 38 | Reflection on potential limitations (e.g., number of experts, response bias) | Discussion- Page 9. | The results are to be viewed critically with regard to the composition of the panel because [REASONS]. |

1 “Experts” are the participants; these can be people from academia, practice, or representatives of lived experience (e.g., patients, family members).

2 The term “questionnaire” stands for the survey instrument regardless of whether quantitative or qualitative items are integrated or weighted.
