# Supplementary material
Source: Research Square preprint supplement (doi:10.21203/rs.3.rs-9657794/v1)
Supplement: Supplementary file 3 [file 6aad6cca23211e68b41dac11.pdf]

## Introduction

This is a questionnaire to establish a Delphi consensus among experts on an Ethical use of Medical-AI.

Questions are based on a Likert scale. State if you agree or disagree with each statement. Use the Statement space provided for any additional feedback.

Thank you for your time!

The questionnaire is divided into 5 blocks:

- Bioethical problems of using medical-AI.
- New bioethical principles.
- Guidelines for a bioethical use of medical-AI.
- Checklist for clinicians.
- Social responsibility markers.

## General Background Information

Gender

Male

Female

Prefer not to say

## Geographical location

- Africa
- Asia
- Europe
- North America
- Oceania
- South America

In what of the following fields is your main background

- Healthcare
- Business
- Policy maker
- Researcher / Academic
- Law specialist
- IT / AI specialist
- Pharmaceutical company representative
- Patient representative / Advocate
- Other

Other:

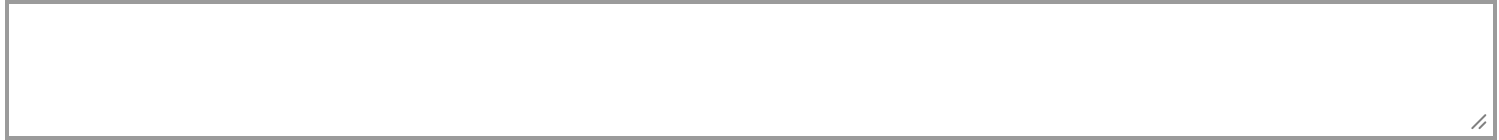

## SOCIAL RESPONSIBILITY MARKERS

### Block: Social Responsibility Markers

We also aim at establishing social responsibility markers that could help guide, analyze and report the ethical use of Medical-AI. These Markers will be reported by institutions and made publicly available. These social responsibility reports should be done regularly to update the public on any new issues, stablish trust in the use of Medical-AI and mitigate some of the bioethical issues of using Medical-AI. Please state if you agree or disagree with each marker. If you would like to comment or add amendments to these markers, feel free to do so in the Statements box provided below.

Strongly disagree   Somewhat disagree   Neither agree nor disagree   Somewhat agree   Strong agree

Were the medical devices that use AI sufficiently validated to be used safely? If yes, explain how and what validation standards were followed. If not, explain why this technology is being used regardless of validation.

Have there been any complains or notifications regarding lack of control over medical systems that use AI? If yes, how many? What measures have been taken to address future issues like this one? Explain these measures.

Have there been any complains or notifications regarding possible biases of medical systems that use AI? If yes, how many? What measures have been taken to address future issues like this one? Explain these measures.

Have there been any complains or notifications regarding unclear accountability and responsibility related to medical systems that use AI and Healthcare Professionals? If yes, how many? What measures have been taken to address future issues like this one? Explain these measures.

Is there a way of knowing when a medical device that uses AI is behaving in an unexpected or dangerous way? If yes, explain which one. If not, explain why it is been used regardless.

How much money has been spent on topics related to Medical-AI? Explain why spending money on this technology is better option than other (also necessary) non-AI resources.

Are the Healthcare Professionals in charge of using medical devices that incorporate AI trained and knowledgeable on how to interpret the output provided by these AI devices? Explain what steps were taken to assure this. If not, explain why.

When were the medical devices that incorporate AI last maintained, supervised and updated? How regularly is this process done?

What benefit have been achieved using Medical-AI compared to not using it?

Has there been any breaches in informed consent where an AI system was involved? If yes, how many? What measures have been taken to address future issues like this one? Explain these measures.

Have there been any complains or notifications regarding discrepancies between medical systems that use AI and Healthcare Professionals? If yes, how many? What measures have been taken to address future issues like this one? Explain these measures.

Did the medical devices that use AI address ethical issues during the development process? If yes, explain how and what possible issues could have been left out. If not, explain why this technology has been used regardless of not addressing ethical issues during development.

Has there been any violation of human rights where an AI system was involved? If yes, how many? Have any measures been taken to address these issues in the future? Explain these measures.

Have there been any complains or notifications regarding lack of trust on medical systems that use AI? If yes, how many? What measures have been taken to address future issues like this one? Explain these measures.

Are the Healthcare Professionals in charge of using medical devices that incorporate AI informed and knowledgeable of the risks of using these AI devices? Explain what steps were taken to assure this. If not, explain why.

Statement:

## CHECKLISTS FOR CLINICIANS

### Block: Checklist for Clinicians

Based on a previous review of the literature regarding the bioethical issues and solution proposals for a bioethical use of Medical-AI, we developed a checklist clinicians could use in their medical practice. This checklist aims to aid clinicians during moral deliberations regarding the use of Medical-AI, as well as help them identify bioethical problems they must avoid. Please state if you agree or disagree with this checklist. If you would like to add new points, remove some points or give any additional feedback, feel free to do so in the Statements box provided below.

|                                                                                   | Dislike a great deal  | Dislike somewhat      | Neither like nor dislike | Like somewhat         | Like a great deal     |
|-----------------------------------------------------------------------------------|-----------------------|-----------------------|--------------------------|-----------------------|-----------------------|
| Is there a way to know when the AI is behaving in an unexpected or dangerous way? | <input type="radio"/> | <input type="radio"/> | <input type="radio"/>    | <input type="radio"/> | <input type="radio"/> |
| Can I trust this AI?                                                              | <input type="radio"/> | <input type="radio"/> | <input type="radio"/>    | <input type="radio"/> | <input type="radio"/> |
| Do I know the risks of using this AI?                                             | <input type="radio"/> | <input type="radio"/> | <input type="radio"/>    | <input type="radio"/> | <input type="radio"/> |

|                                                                              |                       |                       |                       |                       |                       |
|------------------------------------------------------------------------------|-----------------------|-----------------------|-----------------------|-----------------------|-----------------------|
| Has the technology been sufficiently validated to be used safely?            | <input type="radio"/> |
| Have you been informed of the possible biases this AI has?                   | <input type="radio"/> |
| Were ethical issues addressed during the development process?                | <input type="radio"/> |
| Has the patient been informed and consented the use of AI on his/her health? | <input type="radio"/> |
| Do I know and understand what am I accountable for, when using AI?           | <input type="radio"/> |
| Do I have sufficient control over this technology?                           | <input type="radio"/> |
| Does this decision taken with AI impact Human Right?                         | <input type="radio"/> |
| What benefit do I expect from using AI?                                      | <input type="radio"/> |
| Am I doing an appropriate use of resources by using AI?                      | <input type="radio"/> |
| Can I properly interpret AI results?                                         | <input type="radio"/> |
| Is the AI maintained, supervised and updated regularly?                      | <input type="radio"/> |
| Do I agree with the AI decision?                                             | <input type="radio"/> |

Statement:

## GUIDELINES FOR A BIOETHICAL USE OF MEDICAL-AI

## Block: Guidelines For a Bioethical Use of Medical-AI

Here you will find a list of proposals to deal with the bioethical issues of Medical-AI. These proposals intend to guarantee an ethical use of Medical-AI. Please state if you agree or disagree with the following proposals to guarantee a Bioethical Medical-AI. If you would like to propose any other solutions, amendments to these proposals or any other further reasoning, feel free to do so in the Statements boxes provided below.

### Guidelines - Responsibility

#### Responsibility

|                                                                                                          | Strongly disagree     | Somewhat disagree     | Neither agree nor disagree | Somewhat agree        | Strongly agree        |
|----------------------------------------------------------------------------------------------------------|-----------------------|-----------------------|----------------------------|-----------------------|-----------------------|
| Humans are always responsible for AI actions.                                                            | <input type="radio"/> | <input type="radio"/> | <input type="radio"/>      | <input type="radio"/> | <input type="radio"/> |
| Healthcare workers, specifically, are to be held accountable for the actions involving AI in healthcare. | <input type="radio"/> | <input type="radio"/> | <input type="radio"/>      | <input type="radio"/> | <input type="radio"/> |
| Developers of AI must be accountable for the performance of their models.                                | <input type="radio"/> | <input type="radio"/> | <input type="radio"/>      | <input type="radio"/> | <input type="radio"/> |
| There must be shared responsibility between AI developers and healthcare workers.                        | <input type="radio"/> | <input type="radio"/> | <input type="radio"/>      | <input type="radio"/> | <input type="radio"/> |

Statement:

## Guidelines - Sustainability

Sustainability

Ethical reflections and deliberations on the use of Medical-AI must include the environmental impact this technology will have. These can help mitigate the negative effects Medical-AI has on the environment and foster a sustainable development and use of Medical-AI.

Strongly disagree    Somewhat disagree    Neither agree nor disagree    Somewhat agree

          

Statement:

## Guidelines - Compensation for Errors and Harm

# Compensation for Errors and Harm

Strongly disagree      Somewhat disagree      Neither agree nor disagree      Somewhat agree      Strongly agree

We must go beyond establishing who is responsible and establish proper systems and institutions to make sure patients are compensated for any harm caused by Medical-AI.

                      

Statement:

## Guidelines - Explicability

### Explicability

Strongly disagree      Somewhat disagree      Neither agree nor disagree      Somewhat agree      Strongly agree

Individuals are currently not able to properly challenge the results provided by algorithms, so individuals must have the right to an explanation of how and why AI took a decision.

Statement:

[Empty text box for statement input]

## Guidelines - Embedded Ethics

### Embedding Ethics into AI Design

|                                                                                                                                                                                                                                | Strongly disagree     | Somewhat disagree     | Neither agree nor disagree | Somewhat agree        | Strongly agree        |
|--------------------------------------------------------------------------------------------------------------------------------------------------------------------------------------------------------------------------------|-----------------------|-----------------------|----------------------------|-----------------------|-----------------------|
| For an AI to perform "ethically", we cannot expect to "implement ethics in the system" (we cannot use embedded ethics), rather, we must design the AI to be functional in context, including contexts of oversight and review. | <input type="radio"/> | <input type="radio"/> | <input type="radio"/>      | <input type="radio"/> | <input type="radio"/> |
| Medical-AI must be developed with a "people firsts governance".                                                                                                                                                                | <input type="radio"/> | <input type="radio"/> | <input type="radio"/>      | <input type="radio"/> | <input type="radio"/> |
| A value sensitive design could mitigate some ethical concerns regarding AI. This is, to introduce values directly into the AI during development.                                                                              | <input type="radio"/> | <input type="radio"/> | <input type="radio"/>      | <input type="radio"/> | <input type="radio"/> |
| Social responsibility strategies must be included in the design and implementation of Medical-AI. These will help guarantee clear accountability and liability for any harm caused by AI.                                      | <input type="radio"/> | <input type="radio"/> | <input type="radio"/>      | <input type="radio"/> | <input type="radio"/> |
| There must be individual, multidisciplinary ethical deliberation about AI during the development and implementation of each Medical-AI technology.                                                                             | <input type="radio"/> | <input type="radio"/> | <input type="radio"/>      | <input type="radio"/> | <input type="radio"/> |
| Ethics must be integrated into the AI (Embedded ethics), to make the AI an ethical agent.                                                                                                                                      | <input type="radio"/> | <input type="radio"/> | <input type="radio"/>      | <input type="radio"/> | <input type="radio"/> |

All stakeholders should be involved in the development and use process of Medical-AI. This includes patients, healthcare workers, designers, ethics and law experts, and any other stakeholder.

    

Healthcare workers must be involved in the development of Medical-AI.

    

Governments and institutions should be involved in the development of Medical-AI.

    

Ethical alignment must be implemented. Ethical alignment is a principles-driven approach to guarantee Medical-AI behaves in an ethically acceptable way. This means ethically aligned approaches emphasize specific, high-level principles such as transparency, responsibility, fairness, human rights, or human well-being as relevant elements to their applied ethical account.

    

As AI should be accessible to all, there must be a public ethical deliberation of AI systems.

    

Medical-AI must be patient centered. This means patients specifically must be placed at the center of the design, development and use strategies of any Medical-AI.

    

Social stigma must be considered during Medical-AI development and use. These will help avoid AI discrimination and decreasing harm.

    

Medical-AI must be Human-Centered. This means humans must be placed at the center of Medical-AI design and only serve human interests.

    

Patients must be involved in the development process of Medical-AI.

    

Medical-AI must benefit global health, not only developers or patients alone.

Statement:

## Guidelines - Constant Learning

Constant Learning

Strongly disagree      Somewhat disagree      Neither agree nor disagree      Somewhat agree      Strongly agree

Medical-AI should be self-improved, constantly receiving new data to improve its performance an avoid unnecessary harm.

                      

Statement:

## Guidelines - Constant Monitoring

Constant Monitoring

|  |                   |                   |                            |                |                |
|--|-------------------|-------------------|----------------------------|----------------|----------------|
|  | Strongly disagree | Somewhat disagree | Neither agree nor disagree | Somewhat agree | Strongly agree |
|--|-------------------|-------------------|----------------------------|----------------|----------------|

Multidisciplinary group evaluations (with patients and clinicians) should be used to monitor the Medical-AI performance.

|                       |                       |                       |                       |                       |                       |
|-----------------------|-----------------------|-----------------------|-----------------------|-----------------------|-----------------------|
| <input type="radio"/> |
|-----------------------|-----------------------|-----------------------|-----------------------|-----------------------|-----------------------|

Stewardship programs should be implemented to surveil AI and avoid wrongful outputs.

|                       |                       |                       |                       |                       |                       |
|-----------------------|-----------------------|-----------------------|-----------------------|-----------------------|-----------------------|
| <input type="radio"/> |
|-----------------------|-----------------------|-----------------------|-----------------------|-----------------------|-----------------------|

Periodic audits on the Medical-AI performance must be done.

|                       |                       |                       |                       |                       |                       |
|-----------------------|-----------------------|-----------------------|-----------------------|-----------------------|-----------------------|
| <input type="radio"/> |
|-----------------------|-----------------------|-----------------------|-----------------------|-----------------------|-----------------------|

There must be a constant ongoing monitoring of Medical-AI to ensure the AI outputs remain acceptable as clinical practices and disease prevalence evolve. Checking AI systems to make sure they maintain safety and performance standards. Furthermore, performance evaluations of Medical-AI will help mitigate the bias and wrong outputs of Medical-AI.

|                       |                       |                       |                       |                       |                       |
|-----------------------|-----------------------|-----------------------|-----------------------|-----------------------|-----------------------|
| <input type="radio"/> |
|-----------------------|-----------------------|-----------------------|-----------------------|-----------------------|-----------------------|

Statement:

## Guidelines - Control

Control

|                                                                                                                                                     | Strongly disagree     | Somewhat disagree     | Neither agree nor disagree | Somewhat agree        | Strongly agree        |
|-----------------------------------------------------------------------------------------------------------------------------------------------------|-----------------------|-----------------------|----------------------------|-----------------------|-----------------------|
| Medical-AI should only be used by physicians or under physician orders.                                                                             | <input type="radio"/> | <input type="radio"/> | <input type="radio"/>      | <input type="radio"/> | <input type="radio"/> |
| Medical-AI must always be controlled by healthcare workers. Autonomous AI must be avoided.                                                          | <input type="radio"/> | <input type="radio"/> | <input type="radio"/>      | <input type="radio"/> | <input type="radio"/> |
| Medical-AI must only be used for decision-support by clinicians (use AI only as a tool).                                                            | <input type="radio"/> | <input type="radio"/> | <input type="radio"/>      | <input type="radio"/> | <input type="radio"/> |
| Even if autonomous Medical-AI is used, humans must always be able to overrun an AI decision. All AI actions must be able to be cancelled by humans. | <input type="radio"/> | <input type="radio"/> | <input type="radio"/>      | <input type="radio"/> | <input type="radio"/> |

Statement:

## Guidelines - Accesibility

Accesibility

| Strongly disagree | Somewhat disagree | Neither agree nor disagree | Somewhat agree | Strongly agree |
|-------------------|-------------------|----------------------------|----------------|----------------|
|-------------------|-------------------|----------------------------|----------------|----------------|

Medical-AI must be accessible to all patients to diminish the health breach. All must be able to use AI. Benefits and prosperity derived from Medical-AI should be shared with all of humanity.

○ ○ ○ ○ ○

Statement:

[Empty text box for statement input]

## Guidelines - Information, Clinical Relationships and Autonomy

### Information, Clinical Relationships and Autonomy

|                                                                                                                                                  | Strongly disagree | Somewhat disagree | Neither agree nor disagree | Somewhat agree | Strongly agree |
|--------------------------------------------------------------------------------------------------------------------------------------------------|-------------------|-------------------|----------------------------|----------------|----------------|
| Healthcare workers must encourage and respect patient decisions regarding the use of Medical-AI.                                                 | ○                 | ○                 | ○                          | ○              | ○              |
| In the case of a clinical decision being taken by or with the help of AI, patients must have the right to a second opinion where AI is not used. | ○                 | ○                 | ○                          | ○              | ○              |
| Patients must be given the autonomous choice to decide if they want to be treated with AI or without it.                                         | ○                 | ○                 | ○                          | ○              | ○              |
| Patients must always know if they are dealing with a human or with an AI.                                                                        | ○                 | ○                 | ○                          | ○              | ○              |

Patients must always know when AI is being used on their health, the benefits and disadvantages of using it, and be given the choice to use it or not (shared decision-making process to use AI).

○ ○ ○ ○ ○

Statement:

[Empty text box with a slash icon in the bottom right corner]

## Guidelines - Data Management

### Data Management

Strongly disagree   Somewhat disagree   Neither agree nor disagree   Somewhat agree   Strongly agree

Data management and proper security mechanisms must be developed for data protection. These could include: data stewardship, cryptography techniques, homomorphic encryption, secure multiparty computation Garbled circuits, adding noise into data, federated learning, and blockchain among others.

○ ○ ○ ○ ○

Dynamic informed consent models should be used. Dynamic consent models aim at embedding evolving data subject preferences into an open communication process between participants and researchers. When data is used and reused for different research projects, they are only used according to the indicated preferences of participants, who are notified of such use.

Patients should be involved in data collection for AI development and give their informed consent for specific uses of their data.

Patients must have the right to access their own personal data.

Statement:

## Guidelines - Validating AI

### Validating AI

|                      |                      |  |                                     |                   |                   |
|----------------------|----------------------|--|-------------------------------------|-------------------|-------------------|
|                      |                      |  | Neither<br>agree<br>nor<br>disagree |                   |                   |
| Strongly<br>disagree | Somewhat<br>disagree |  |                                     | Somewhat<br>agree | Strongly<br>agree |

Medical-AI must only be used after an appropriate risk and benefits analysis of the use of Medical-AI is carried out.

Competing interests must be stated by Medical-AI developers for a transparent Medical-AI development.

Medical-AI must always be validated scientifically and proven to be safe before it is used on humans. Evidence-Based Medicine must be used for the development of algorithms, to avoid bias and harm

Medical-AI must be developed to mitigate bias and cyber-attacks, creating a more robust AI.

Data sets used to train AI must be accurate and scientifically proven (validated). This way AI can avoid bias and harm. Only the best clinical knowledge available must be used develop AI. Data used to develop Medical-AI must be robust.

Statement:

## Guidelines - Training

Training

|                      |                      |                  |                   |                   |
|----------------------|----------------------|------------------|-------------------|-------------------|
|                      |                      | Neither<br>agree |                   |                   |
| Strongly<br>disagree | Somewhat<br>disagree | nor<br>disagree  | Somewhat<br>agree | Strongly<br>agree |

Healthcare workers must be trained to understand how AI works and be able to take proper decisions using AI.

Medical Schools (universities) must include AI courses into their curriculum to help make an ethical use of Medical-AI

Not only healthcare workers, but also patients must be educated on AI. Understanding how AI works can empower patients to make autonomous decision.

Accreditation must be needed to use Medical-AI, provided prior training, when using Medical-AI.

Statement:

## Guidelines - Adapt AI to Social Context

Adapt Medical-AI to the Social Context and Place where it is Being Used

Strongly disagree
  Somewhat disagree
  Neither agree nor disagree
  Somewhat agree
  Strongly agree

Social and cultural factors that might facilitate or impede the acceptance of AI technology in healthcare must be considered during its design and use. To avoid bias and discrimination, Medical-AI must be adapted to the social, cultural and endemic context where it is being used. This means Medical-AI might have to be trained with different data sets for it to be validated for use in different populations or different predictive models might need to be used for different populations. These can mitigate injustice towards certain social, religious or ethnic groups.

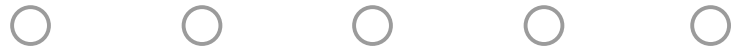

Statement:

## NEW BIOETHICAL PRINCIPLES

Block: New Bioethical Principles

To address the bioethical issues of Medical-AI, several new ethical principles have been proposed to guarantee a bioethical use of Medical-AI. By “new bioethical principles” we mean principles other than the main four bioethical principles proposed by Beauchamp and Childress: Autonomy, Non-Maleficence, Beneficence and Justice. Here you will find a list of the new

bioethical principles proposed. State if you agree or disagree with the need to add these principles as new bioethical principles to guarantee an ethical use of Medical-AI. If you consider any other bioethical principle not mentioned on this list should be used, feel free explain which other principles should be added. Also, feel free to include any further comments or reasonings in the Statement sections provided below.

To clarify, this part of the questionnaire is about new ethical PRINCIPLES other than autonomy, non-maleficence, beneficence and justice; NOT about values or virtues necessary for a bioethical use of Medical-AI.

|                          | Strongly disagree     | Somewhat disagree     | Neither agree nor disagree | Somewhat agree        | Strongly agree        |
|--------------------------|-----------------------|-----------------------|----------------------------|-----------------------|-----------------------|
| Governance               | <input type="radio"/> | <input type="radio"/> | <input type="radio"/>      | <input type="radio"/> | <input type="radio"/> |
| Governability            | <input type="radio"/> | <input type="radio"/> | <input type="radio"/>      | <input type="radio"/> | <input type="radio"/> |
| Rule of Law              | <input type="radio"/> | <input type="radio"/> | <input type="radio"/>      | <input type="radio"/> | <input type="radio"/> |
| Lawfulness               | <input type="radio"/> | <input type="radio"/> | <input type="radio"/>      | <input type="radio"/> | <input type="radio"/> |
| Democracy                | <input type="radio"/> | <input type="radio"/> | <input type="radio"/>      | <input type="radio"/> | <input type="radio"/> |
| Human Rights             | <input type="radio"/> | <input type="radio"/> | <input type="radio"/>      | <input type="radio"/> | <input type="radio"/> |
| Teamwork and Cooperation | <input type="radio"/> | <input type="radio"/> | <input type="radio"/>      | <input type="radio"/> | <input type="radio"/> |
| Solidarity               | <input type="radio"/> | <input type="radio"/> | <input type="radio"/>      | <input type="radio"/> | <input type="radio"/> |
| Inclusivity              | <input type="radio"/> | <input type="radio"/> | <input type="radio"/>      | <input type="radio"/> | <input type="radio"/> |
| Diversity/Pluralism      | <input type="radio"/> | <input type="radio"/> | <input type="radio"/>      | <input type="radio"/> | <input type="radio"/> |
| Accessibility            | <input type="radio"/> | <input type="radio"/> | <input type="radio"/>      | <input type="radio"/> | <input type="radio"/> |

|                                   |                       |                       |                       |                       |                       |
|-----------------------------------|-----------------------|-----------------------|-----------------------|-----------------------|-----------------------|
| Sharing of benefits               | <input type="radio"/> |
| Human Dignity                     | <input type="radio"/> |
| Body and Mental Integrity         | <input type="radio"/> |
| Application of Human Values       | <input type="radio"/> |
| Privacy and confidentiality       | <input type="radio"/> |
| Compassion                        | <input type="radio"/> |
| Vulnerability                     | <input type="radio"/> |
| Awareness of Misuse               | <input type="radio"/> |
| Validation                        | <input type="radio"/> |
| Safety                            | <input type="radio"/> |
| Caution                           | <input type="radio"/> |
| Relevance                         | <input type="radio"/> |
| Utility                           | <input type="radio"/> |
| Robustness and security           | <input type="radio"/> |
| Interpretability                  | <input type="radio"/> |
| Trustworthiness                   | <input type="radio"/> |
| Accountability and responsibility | <input type="radio"/> |
| Explicability                     | <input type="radio"/> |
| Transparency                      | <input type="radio"/> |
| Contestability                    | <input type="radio"/> |
| Sustainability                    | <input type="radio"/> |

Statement:

## BIOETHICAL ISSUES OF THE USE OF MEDICAL-AI

BLOCK: Bioethical problems of using medical-AI.

On a previous review, we classified Bioethical issues derived from the use of medical-AI into the following categories.

State if you agree or disagree with each of these categories being a bioethical issue of relevance:

|                              | Strongly disagree     | Somewhat disagree     | Neither agree nor disagree | Somewhat agree        | Strongly agree        |
|------------------------------|-----------------------|-----------------------|----------------------------|-----------------------|-----------------------|
| Justice and discrimination   | <input type="radio"/> | <input type="radio"/> | <input type="radio"/>      | <input type="radio"/> | <input type="radio"/> |
| Maleficence                  | <input type="radio"/> | <input type="radio"/> | <input type="radio"/>      | <input type="radio"/> | <input type="radio"/> |
| Drug development             | <input type="radio"/> | <input type="radio"/> | <input type="radio"/>      | <input type="radio"/> | <input type="radio"/> |
| Autonomy and Biomedical Data | <input type="radio"/> | <input type="radio"/> | <input type="radio"/>      | <input type="radio"/> | <input type="radio"/> |
| Self-regulation              | <input type="radio"/> | <input type="radio"/> | <input type="radio"/>      | <input type="radio"/> | <input type="radio"/> |
| Technological imperialism    | <input type="radio"/> | <input type="radio"/> | <input type="radio"/>      | <input type="radio"/> | <input type="radio"/> |

|                                    |                       |                       |                       |                       |                       |
|------------------------------------|-----------------------|-----------------------|-----------------------|-----------------------|-----------------------|
| Sustainability                     | <input type="radio"/> |
| Employment                         | <input type="radio"/> |
| Security                           | <input type="radio"/> |
| Effect on clinical relationships   | <input type="radio"/> |
| Human rights                       | <input type="radio"/> |
| Responsibility and decision-making | <input type="radio"/> |

Statement:

Powered by Qualtrics
