# Supplementary material
Source: Research Square preprint supplement (doi:10.21203/rs.3.rs-9657794/v1)
Supplement: Supplementary file 4 [file 76cb4d09e2c224f814eb4e0c.docx]

**Table of Excluded Items**

| **Excluded Items** |
| --- |
| **E1:** Drug development: AI could be used to cut safety regulations that help make drugs safe. |
| **E2:** Employment (such as AI increasing unemployment and taking over jobs). |
| **E3:** Self-regulation (by this we mean business could develop their own internal standards of ethical use of AI with no external coercion to enforce them) |
| **E4:** Lawfulness |
| **E5:** Penalty for non-compliance |
| **E6:** Relevance |
| **E7:** Contestability |
| **E8:** Accountability and responsibility has enough intrinsic value to be considered an independent new bioethical principle. |
| **E9:** Explicability, has enough intrinsic value to be considered an independent new bioethical principle. |
| **E10:** Transparency, has enough intrinsic value to be considered an independent new bioethical principle. |
| **E11:** Trustworthiness, has enough intrinsic value to be considered an independent new bioethical principle. |
| **E12:** Responsibility should also be shared with patients themselves |
| **E13:** Responsibility should also be shared with the individual person using the Medical-AI |
| **E14:** IC should generally NOT be required, even though there might be specific situations or circumstances were an IC IS required regarding the use of Medical AI. |
| **E15:** IC should generally BE required, even though there might be specific situations or circumstances were an IC is NOT required regarding the use of Medical AI. |
| **E16:** IC should ALWAYS be required. |
| **E17:** Ethics must be integrated into the AI (Embedded ethics), to make the AI an ethical agent. |
| **E18:** Medical-AI must only be used to aid in healthcare professional’s decision making (use AI only as a tool). (Note: not necessarily physicians only) |
| **E19:** Medical-AI should only be used by physicians or under physician orders. |
| **E20:** Informed Consent might not always be necessary for the use of AI on patient health. |
| **E21:** Accreditation might NOT always be needed to use Medical-AI, provided prior training, when using Medical-AI. |
| **E22:** Has there been any violation of human rights where an AI system was involved? If yes, how many? Have any measures been taken to address these issues in the future? Explain these measures. |
| **E23:** How much money has been spent on topics related to Medical- AI (such as acquisition and maintenance costs)? Explain why spending money on this technology is better option than other (also necessary) non-AI resources, and if any money has been saved due to this. |
| **E24:** Did the medical devices that use AI address ethical issues during the development process? If yes, explain how and what possible issues could have been left out. If not, explain why this technology has been used regardless of not addressing ethical issues during development. |
| **Unstable Items** |
| **U1:** Health Law |
| **U2:** Dynamic informed consent models should be used whenever possible and within reason. Dynamic consent models aim at embedding evolving data subject’ preferences into an open communication process between participants and researchers. When data is used and reused for different research projects, they are only used according to the indicated preferences of participants, who are notified of such use. |
| **U3:** Individuals are currently not able to properly challenge the results provided by algorithms, so individuals must have the right to an explanation of how and why AI took a decision. |
