# Supplementary material
Source: Research Square preprint supplement (doi:10.21203/rs.3.rs-9657794/v1)
Supplement: Supplementary file 7 [file c9a2b6906e5771d4cb0eda0a.docx]

**Changes Made After the Last Delphi Survey Round**

| **Original Statement** | **Final Statement** | **Rationale** |
| --- | --- | --- |
| There must be shared responsibility between all stakeholders mentioned. | **R49:** There must be shared responsibility between all stakeholders mentioned (such as healthcare professionals, care givers, patients, healthcare institutions, policy makers, or developers) | To avoid confusion and redundancy and provide a clear list of some of the key stakeholders involved. |
| Explicability should not be absolute, as healthcare professionals and patients do not have to understand and have an explanation for EVERYTHING the AI does, but rather just enough to take informed decisions. | **R55:** Explicability should not be absolute, as healthcare professionals and patients do not have to understand and have an explanation for EVERYTHING the AI does, but rather just enough to take informed decisions prudently. | “Prudently” added to clarify that in cases were IC might not be required; physicians should be prudent and communicate with patients with the heights level of professionalism and adhering to professional codes of ethics. |
| Regardless of Human oversight,  Medical-AI should be self-  improved, constantly receiving  new data to improve its  performance an avoid  unnecessary harm. | **R72:** Even with the use of Human oversight, Medical-AI should be self-improved, constantly receiving new data to improve its performance an avoid unnecessary harm, whenever possible to do ethically. | Emphasize the need for human oversight and accept limitations to these requirements. |
| Multidisciplinary group evaluations (with patients and clinicians) should be used to monitor the Medical-AI performance. | **R74:** Multidisciplinary group evaluations (with patients, or patient advocates, and clinicians) should be used to monitor the Medical-AI performance. | Patients must not want to participate and should not be forced to do so. In these cases, patient advocates could be a viable alternative. |
| Stewardship programs should be implemented to surveil AI and avoid wrongful outputs. | **R75:** Stewardship or monitoring programs should be implemented to surveil AI and avoid wrongful outputs. | Provide alternatives and facilitate understanding. |
| Medical-AI must always be controlled by healthcare workers. Autonomous AI must be avoided. | **R79:** Medical-AI must always be controlled by healthcare workers. Autonomous AI must be avoided whenever possible or unnecessary. | Accepting there might be cases autonomous AI might be used or be required, can help make the guidelines more useful and better reflect the realities of clinical practice. |
| Patients must always know when AI is being used on their health, the benefits and disadvantages of using it, and be given the choice to use it or not (shared decision-making process to use AI). | **R81:** Patients must always know when AI is being used on their health, the benefits and disadvantages of using it, and be given the choice to use it or not (shared decision-making process to use AI). Whenever reasonable and within the standard guidelines of care and recommendations. | To better adapt to, and reflect the, realities of clinical practice. |
| There should be dynamic informed consent models where participants can withdraw their personal data at any given time for any reason. | **R89:** There should be dynamic informed consent models where participants can withdraw their personal data at any given time for any reason. These should be used whenever possible and within reason. | Dynamic informed consent models might not be possible to integrate into all healthcare settings. Several factors could impede this, for example, low-income countries or lack of resources. |
